# Supplementary material for: Naphthyl-azine – aggregation induced emission, reversible acidochromism, cyanide sensing and its application in intracellular imaging
Source: Royal Society of Chemistry journal article supplement (doi:10.1039/d3ma00095h), 2023-01-01
Supplement: d3ma00095h1.pdf [file d3ma00095h1.pdf]

## **Supporting Information**

### **Naphthyl-Azine - Aggregation Induced Emission, Reversible Acidochromism, Cyanide sensing and its application in Intracellular Imaging**

Sukanya Paul, Kingshuk Debsharma, Sunanda Dey, Satyajit Halder, Kuladip Jana, Chittaranjan  
Sinha\*

| Sl. No. | Contents                                                                                                                                     | Fig/Tables No.  |
|---------|----------------------------------------------------------------------------------------------------------------------------------------------|-----------------|
| 1.      | Solution for Spectral Measurement                                                                                                            |                 |
| 2.      | <sup>1</sup> H NMR Spectrum (300 MHz) of the probe H <sub>2</sub> L in CDCl <sub>3</sub>                                                     | <b>Fig. S1</b>  |
| 3.      | <sup>13</sup> C NMR Spectrum (75 MHz) of H <sub>2</sub> L in CDCl <sub>3</sub>                                                               | <b>Fig. S2</b>  |
| 4.      | ESI-MS Spectrum of H <sub>2</sub> L                                                                                                          | <b>Fig. S3</b>  |
| 5.      | IR Spectrum of the probe H <sub>2</sub> L                                                                                                    | <b>Fig. S4</b>  |
| 6.      | Crystal Data and Refined Parameters for H <sub>2</sub> L                                                                                     | <b>Table S1</b> |
| 7.      | Bond length of H <sub>2</sub> L (Experimental & Theoretical):                                                                                | <b>Table S2</b> |
| 8.      | Bond Angle of H <sub>2</sub> L (Experimental and Theoretical):                                                                               | <b>Table S3</b> |
| 9.      | UV-Vis Absorption Spectrum of H <sub>2</sub> L in CH <sub>3</sub> CN                                                                         | <b>Fig. S5</b>  |
| 10.     | DLS Spectrum of H <sub>2</sub> L in CH <sub>3</sub> CN/H <sub>2</sub> O fraction f <sub>w</sub> (a) 0% (b) 30% (c) 80% (d) 100%              | <b>Fig. S6</b>  |
| 11.     | Time-dependent fluorescence spectra of the thin film exposed to UV light (λ <sub>ex</sub> = 365 nm) for 2.5 h                                | <b>Fig. S7</b>  |
| 12.     | Bar plot showing QE(%)s of solid emissive test kits after exposure to the saturated acid vapors of common interfering agents for 10 minutes. | <b>Fig. S8</b>  |
| 13.     | Kinetics of time dependent response Decay                                                                                                    | <b>Fig. S9</b>  |
| 14.     | Limit of Detection for HTFA Vapor Sensing.                                                                                                   | <b>Fig. S10</b> |
| 15.     | Nitrogen adsorption–desorption isotherms of (a)H <sub>2</sub> L, (b) H <sub>2</sub> L+HTFA and (c) H <sub>2</sub> L+HTFA+TEA.                | <b>Fig. S11</b> |
| 16.     | Limit of Detection for CN <sup>-</sup> sensing of the probe H <sub>2</sub> L.                                                                | <b>Fig. S12</b> |
| 18.     | Comparative Table for Reported Probes towards CN <sup>-</sup> and TFA detection and their sensing features.                                  | <b>Table S4</b> |
| 19.     | Determination of Binding Constant (K <sub>d</sub> ) from Benesi-Hildreband Plot of                                                           | <b>Fig. S13</b> |

CN<sup>-</sup> Titration Curve.

20. Changes in **(a)** Absorption ( $\lambda_{\text{abs}} = 479 \text{ nm}$ ) and **(b)** Emission Spectra ( $\lambda_{\text{exc}} = 570 \text{ nm}$ ) of H<sub>2</sub>L and H<sub>2</sub>L+CN under different pH. **Fig. S14**
  21. Changes in **(a)** Absorption ( $\lambda_{\text{abs}} = 479 \text{ nm}$ ) and **(b)** Emission Spectra ( $\lambda_{\text{exc}} = 570 \text{ nm}$ ) of H<sub>2</sub>L and H<sub>2</sub>L+CN under temperature variation from 5°C to 75°C. **Fig.S15**
  22. Changes in **(a)** Absorption ( $\lambda_{\text{abs}} = 479 \text{ nm}$ ) and **(b)** Emission Spectra ( $\lambda_{\text{exc}} = 570 \text{ nm}$ ) of H<sub>2</sub>L and H<sub>2</sub>L+CN on time variation for about 2 hrs. **Fig.S16**
  23. IR spectrum of H<sub>2</sub>L and (H<sub>2</sub>L+CN<sup>-</sup>) adduct **Fig.S17**
  24. ESI-MS(-) mode of CN<sup>-</sup> Complex (L<sup>2-</sup>). **Fig.S18**
  25. TD-DFT transition of H<sub>2</sub>L and CN<sup>-</sup> complex (L<sup>2-</sup>) . **Table S5**
  26. Electrostatic Potential (ESP) Mapping of the optimized probe H<sub>2</sub>L calculated from B3LYP/6-311g level with scale bar (Kcal/mol). **Fig.S19.**
  27. Molecular Orbitals of H<sub>2</sub>L and their corresponding energies **Tables S6**
  28. Molecular Orbitals of L<sup>2-</sup> and their corresponding energies **Tables S7**
  29. (a) Absorption and (b) Fluorescence Spectra of H<sub>2</sub>L towards CN<sup>-</sup> in different food samples. **Fig.S20**
  30. Change in the Absorption Spectra of CN<sup>-</sup> Complex on gradual addition of HTFA (H<sup>+</sup>). **Fig.S21**
  31. Reversible Cycles on addition of CN<sup>-</sup>/H<sup>+</sup>. **Fig.S22**
  32. Cell survivability of MDA-MB 231 and WI-38 cells exposed to ligand H<sub>2</sub>L concentration. Data are representative of at least three independent experiments and bar graph shows mean  $\pm$  SEM, \* $p < 0.001$  were interpreted as statistically significant, as compared with the control **Fig.S23**
  33. Reference
-

## Solution for Spectral Measurement

For UV-Vis and Fluorescence study, the ligand H<sub>2</sub>L with concentration of  $1 \times 10^{-3}$ (M) was prepared in DMSO. All anionic solutions of  $1 \times 10^{-3}$ (M) were arranged in CH<sub>3</sub>CN. The Spectroscopic experiment was carried out in acetonitrile medium. A 25  $\mu$ M of HL solution was prepared in 2 mL CH<sub>3</sub>CN/H<sub>2</sub>O (99:1, v/v) (HEPES Buffer, pH 7.5) for sensing study. To this solution 2 equivalent of anions were added and the sensitivity and selectivity was checked by UV-vis and Fluorescence measurement of the probe H<sub>2</sub>L solution. The absorption and emission path length of cell used were 1 cm. Fluorescence measurement experiments were done on excitation and emission of 12 nm x 3 nm (For HTFA vapor) and 10 nm x 10 nm (For CN<sup>-</sup>) slit width.

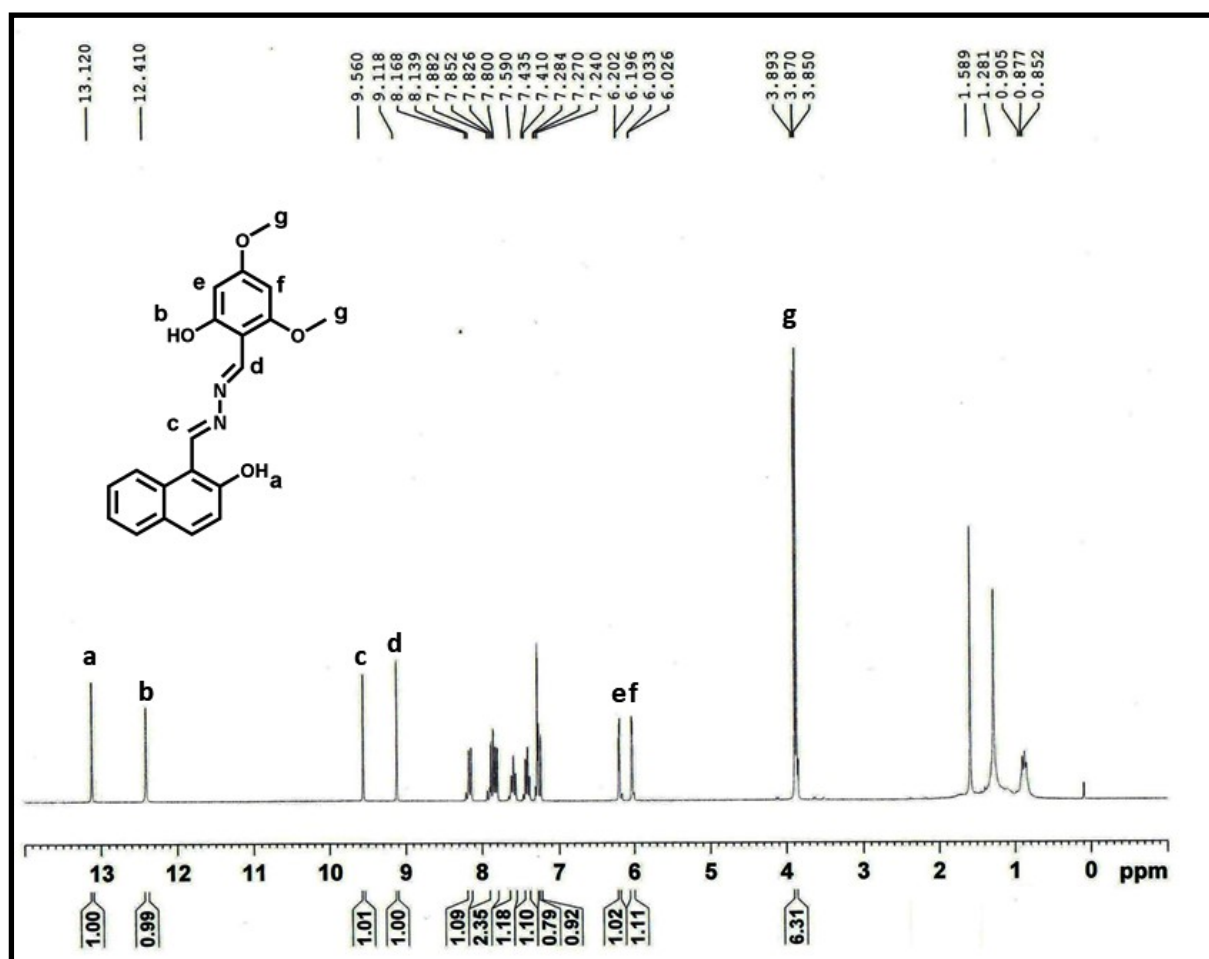

**Fig. S1.** <sup>1</sup>H NMR Spectra of the probe H<sub>2</sub>L (CDCl<sub>3</sub>, 300 MHz)

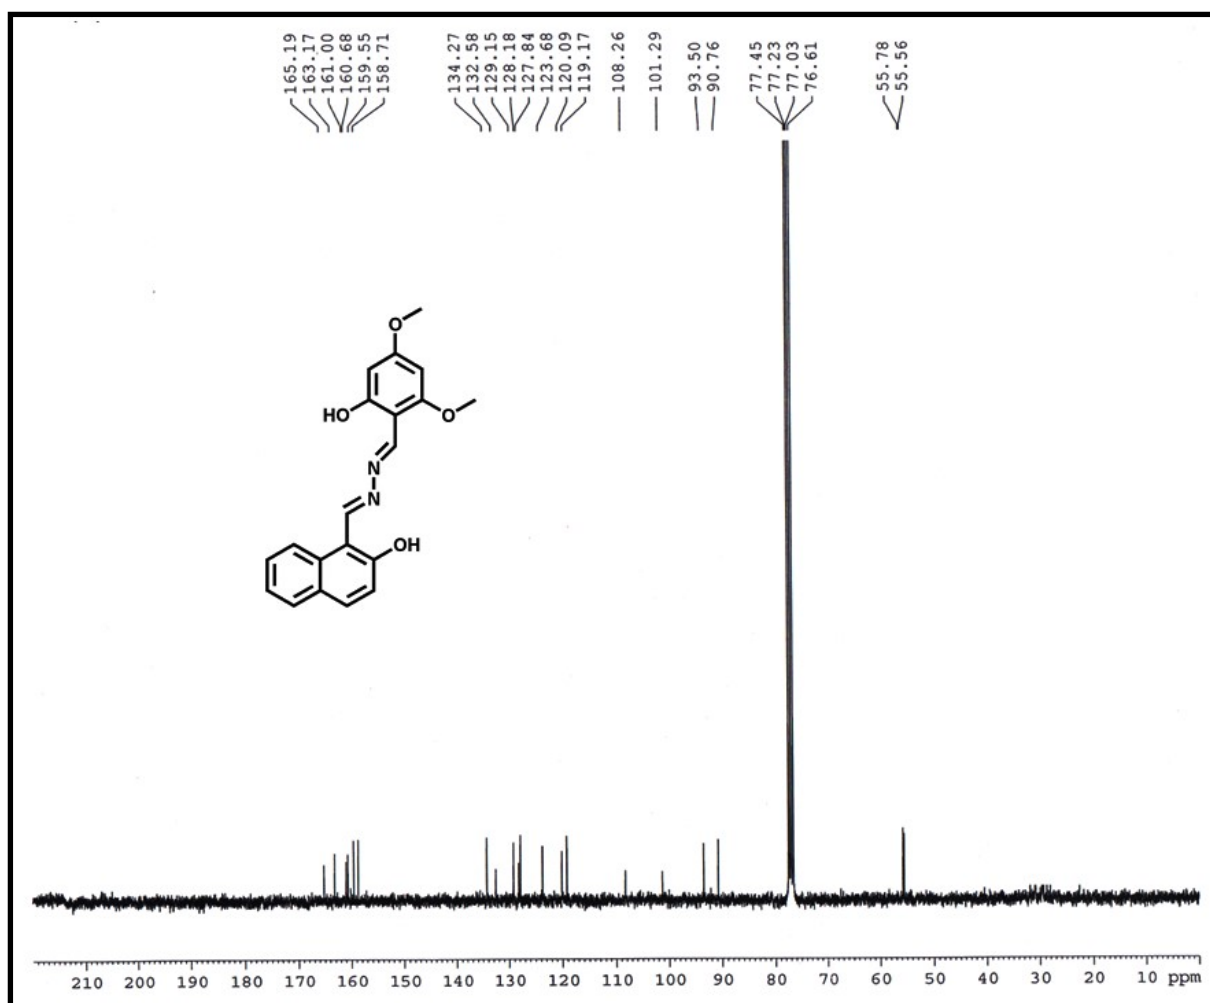

**Fig. S2.**  $^{13}\text{C}$ NMR Spectrum of the probe  $\text{H}_2\text{L}$  ( $\text{CDCl}_3$ , 75 MHz)

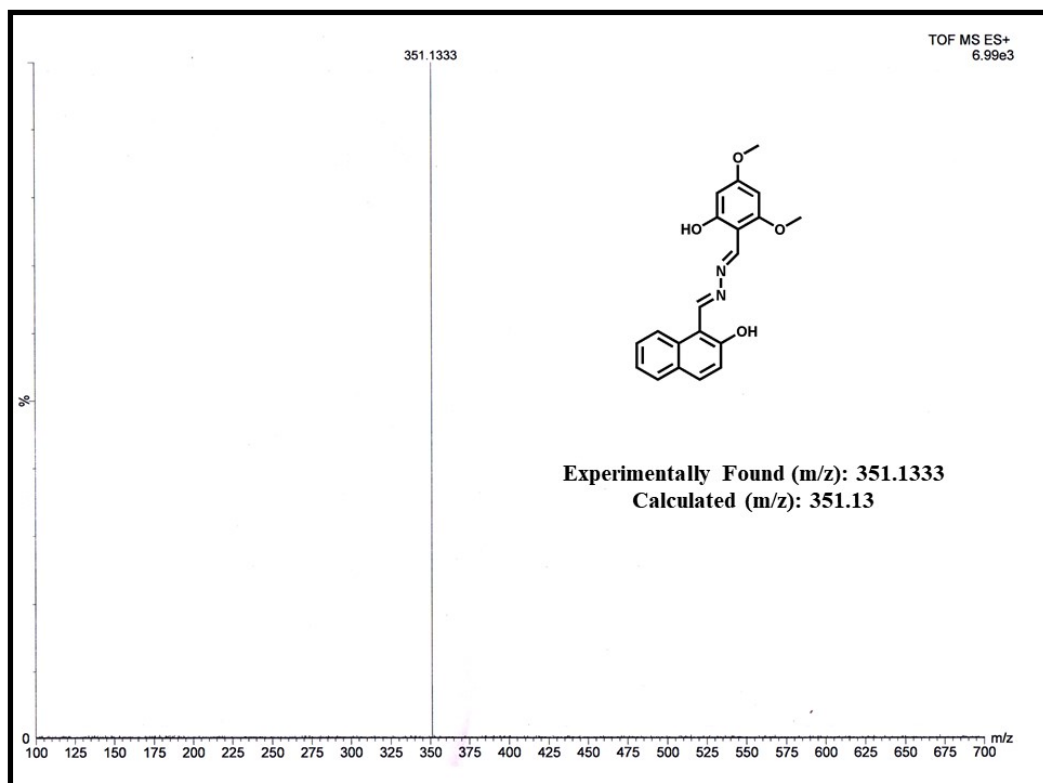Fig.S3 ESI-MS(+) of the Ligand H<sub>2</sub>L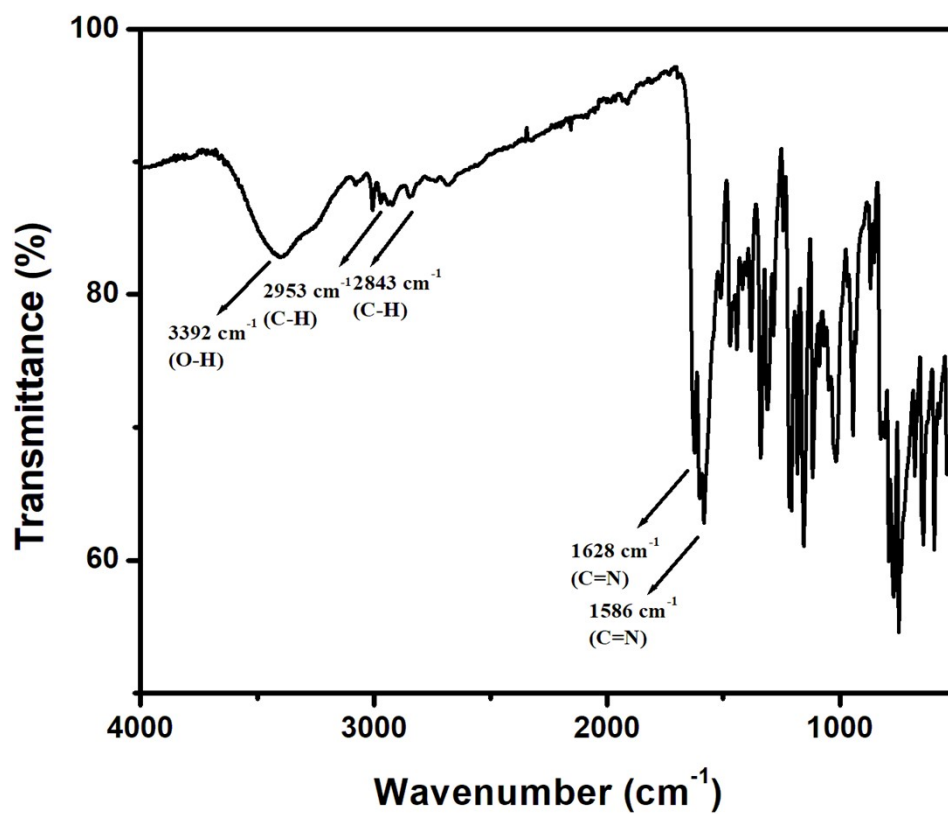Fig.S4 IR Spectrum of the probe H<sub>2</sub>L

**Table S1.** Crystal Data and Refined Parameters for H<sub>2</sub>L

|                                  |                                                               |
|----------------------------------|---------------------------------------------------------------|
| <b>Empirical formula</b>         | <b>C<sub>20</sub>H<sub>18</sub>N<sub>2</sub>O<sub>4</sub></b> |
| <b>CCDC No.</b>                  | 2178275                                                       |
| <b>Formula weight</b>            | 350.36                                                        |
| <b>Temperature (K)</b>           | 100(2) K                                                      |
| <b>System</b>                    | Orthorhombic                                                  |
| <b>Space group</b>               | P n a 21                                                      |
| <b>a (Å)</b>                     | 11.7509(4)                                                    |
| <b>b (Å)</b>                     | 9.3631(3)                                                     |
| <b>c (Å)</b>                     | 30.1678(10)                                                   |
| <b>α/°</b>                       | 90                                                            |
| <b>β/°</b>                       | 90                                                            |
| <b>γ/°</b>                       | 90                                                            |
| <b>V (Å)<sup>3</sup></b>         | 3319.21(19)                                                   |
| <b>Z</b>                         | 8                                                             |
| <b>D(cal) /g cm<sup>-3</sup></b> | 1.402                                                         |
| <b>μ/mm<sup>-1</sup></b>         | 0.813                                                         |
| <b>λ(Å)</b>                      | 1.54178                                                       |
| <b>Data[I &gt;2σ(I)]/param</b>   | 6304/474                                                      |

|                         |        |
|-------------------------|--------|
| $R_1^a[I > 2\sigma(I)]$ | 0.0517 |
| $wR_2^b$                | 0.1343 |
| GOF <sup>c</sup>        | 1.090  |

---

<sup>a</sup> $R_1 = \Sigma|F_o| - |F_c| / \Sigma|F_o|$ ; <sup>b</sup> $wR_2 = \{\Sigma[w(F_o^2 - F_c^2)^2] / \Sigma[w(F_o^2)^2]\}^{1/2}$ ;  $w = [\sigma^2(F_o)^2 + (0.1003P)^2 + 4.9693P]^{-1} (F_o^2 + 2F_c^2)/3$ ; <sup>c</sup> Goodness-of-fit.



**Table S2:** Bond length of H<sub>2</sub>L (Experimental & Theoretical):

| <b>Bond Length</b>    | <b>Å</b> | <b>Bond Length</b>   | <b>Å</b> |
|-----------------------|----------|----------------------|----------|
| <b>(Experimental)</b> |          | <b>(Theoretical)</b> |          |
| N2-N1                 | 1.396    | N12-N13              | 1.415    |
| C22-N1                | 1.298    | N12-C11              | 1.312    |
| C22-C23               | 1.454    | C11-C10              | 1.447    |
| C23-C24               | 1.400    | C10-C9               | 1.414    |
| C24-O3                | 1.345    | C9-O20               | 1.358    |
| O3-H3                 | 0.840    | O20-H44              | 1.024    |
| N2-C33                | 1.304    | N13-C14              | 1.303    |
| C33-C34               | 1.440    | C14-C15              | 1.449    |
| C34-C35               | 1.410    | C15-C16              | 1.418    |
| C35-O8                | 1.349    | C16-O21              | 1.389    |
| O8-H8                 | 0.840    | O21-H22              | 0.974    |

**Table S3:** Bond Angle of H<sub>2</sub>L (Experimental and Theoretical):

| <b>Bond Angle</b>     | <b>Degree (°)</b> | <b>Bond Angle</b>    | <b>Degree (°)</b> |
|-----------------------|-------------------|----------------------|-------------------|
| <b>(Experimental)</b> |                   | <b>(Theoretical)</b> |                   |
| C33-N2-N1             | 112.45            | C14-N13-N12          | 112.49            |

|                    |        |                     |        |
|--------------------|--------|---------------------|--------|
| <b>C22-N1-N2</b>   | 113.91 | <b>C11-N12-N13</b>  | 113.72 |
| <b>N1-C22-C23</b>  | 120.65 | <b>N12- C11-C10</b> | 121.81 |
| <b>C22-C23-C24</b> | 119.92 | <b>C11-C10-C9</b>   | 119.44 |
| <b>C23-C24-O3</b>  | 123.07 | <b>C10-C9-O26</b>   | 121.86 |
| <b>C24-O3-H3</b>   | 109.50 | <b>C9-O20-H44</b>   | 108.88 |
| <b>N2-C33-C34</b>  | 131.96 | <b>N13-C14-C15</b>  | 126.41 |
| <b>C33-C34-C35</b> | 122.12 | <b>C14-C15-C16</b>  | 118.91 |
| <b>C34-C35-O8</b>  | 121.31 | <b>C15-C16-O21</b>  | 123.05 |
| <b>C35-O8-H8</b>   | 103.42 | <b>C16-O21-H37</b>  | 113.16 |

---

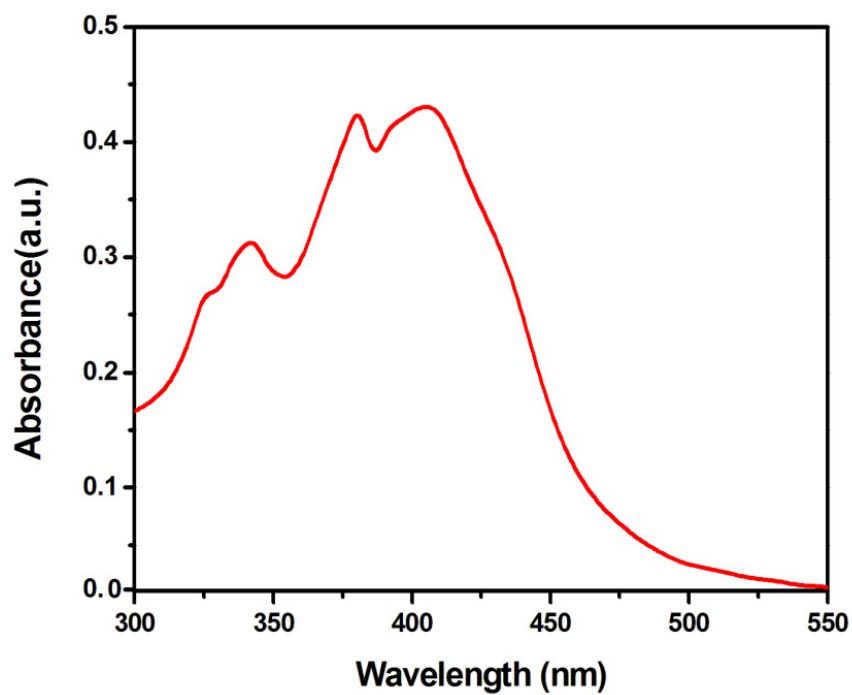

Fig.S5. Absorption Spectrum of H<sub>2</sub>L in CH<sub>3</sub>CN.

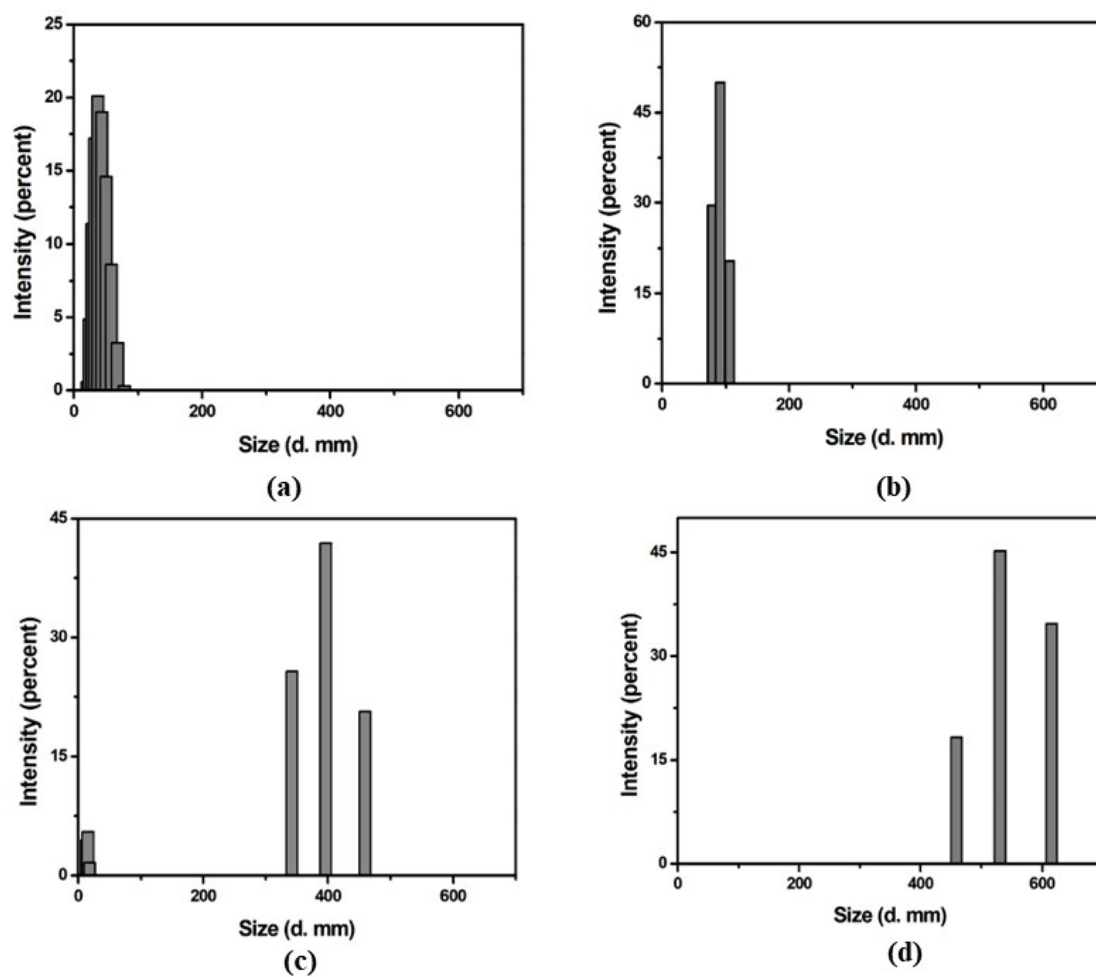

Fig.S6. DLS Spectrum of H<sub>2</sub>L in CH<sub>3</sub>CN/H<sub>2</sub>O fraction f<sub>w</sub> (a) 0% (b) 30% (c) 80% (d) 100%

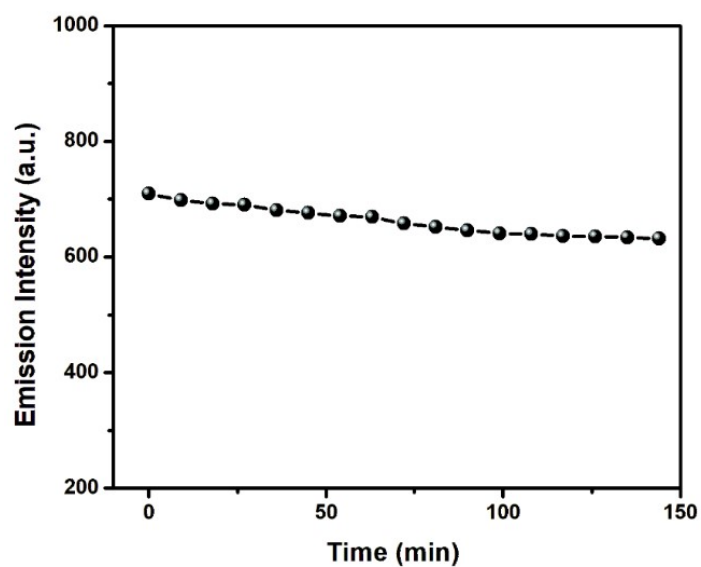

Fig.S7 Time-dependent fluorescence spectra of the thin film exposed to UV light (λ<sub>ex</sub> = 365 nm) for 2.5 h

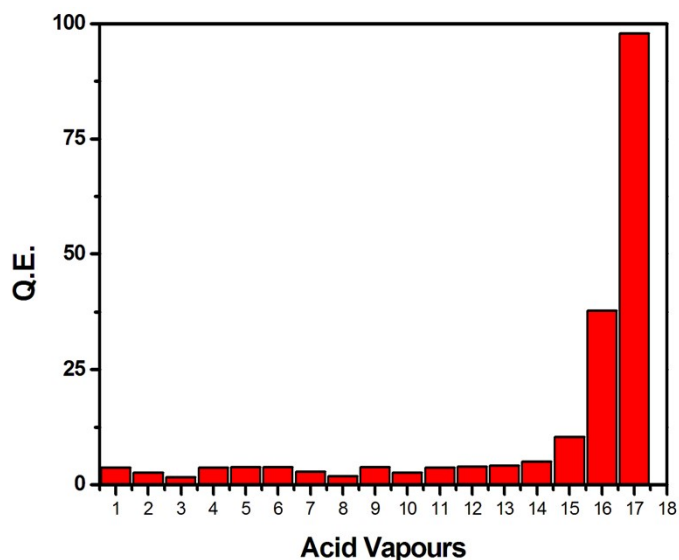

**Fig. S8.** Bar plot showing QE(%)s of solid emissive test kits after exposure to the saturated acid vapors of common interfering agents for 10 minutes. The analytes used are: 1. Acetonitrile ( $\text{CH}_3\text{CN}$ ) 2. Ethanol ( $\text{EtOH}$ ) 3. Tetrahydrofuran (THF) 4. Dichloromethane (DCM) 5. n-Hexane (n-HXN) 6. Toluene (TOL) 7. phosphoric acid, 8. propionic acid, 9. sulphuric acid, 10. methane sulfonic acid, 11. methacrylic acid, 12. heptanoic acid, 13. oleic acid, 14. Acetic Acid ( $\text{AcOH}$ ) 15. Nitric Acid ( $\text{HNO}_3$ ) 16. Hydrochloric Acid ( $\text{HCl}$ ) and 17. Trifluoroacetic Acid (HTFA). The emission was recorded with 5 minutes interval for each turn.

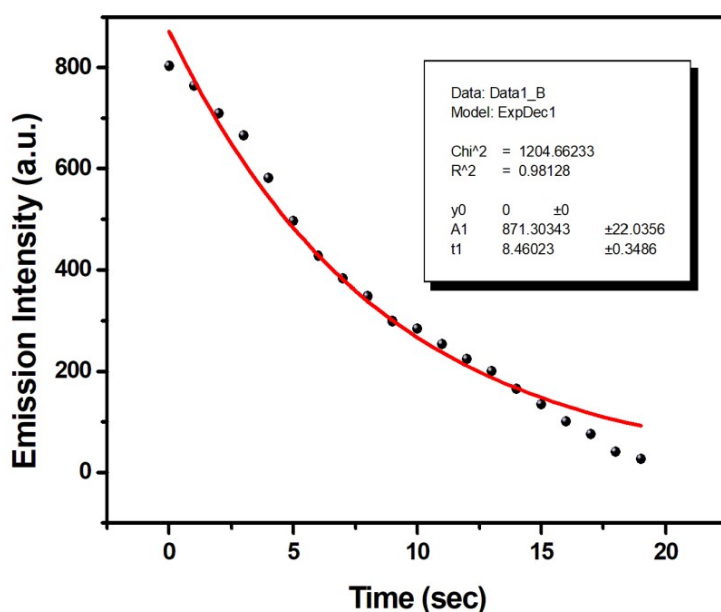

**Fig. S9.** Kinetics of time dependent response Decay

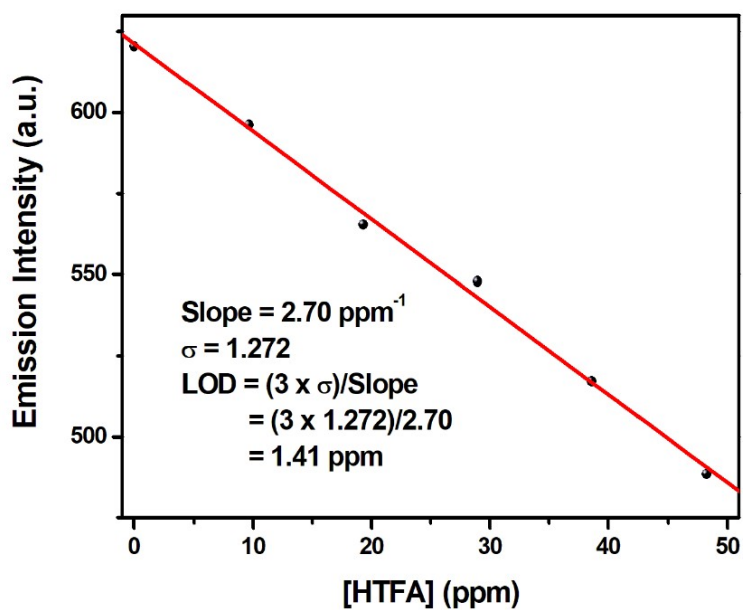

Fig. S10. Limit of Detection for HTFA Vapor Sensing.

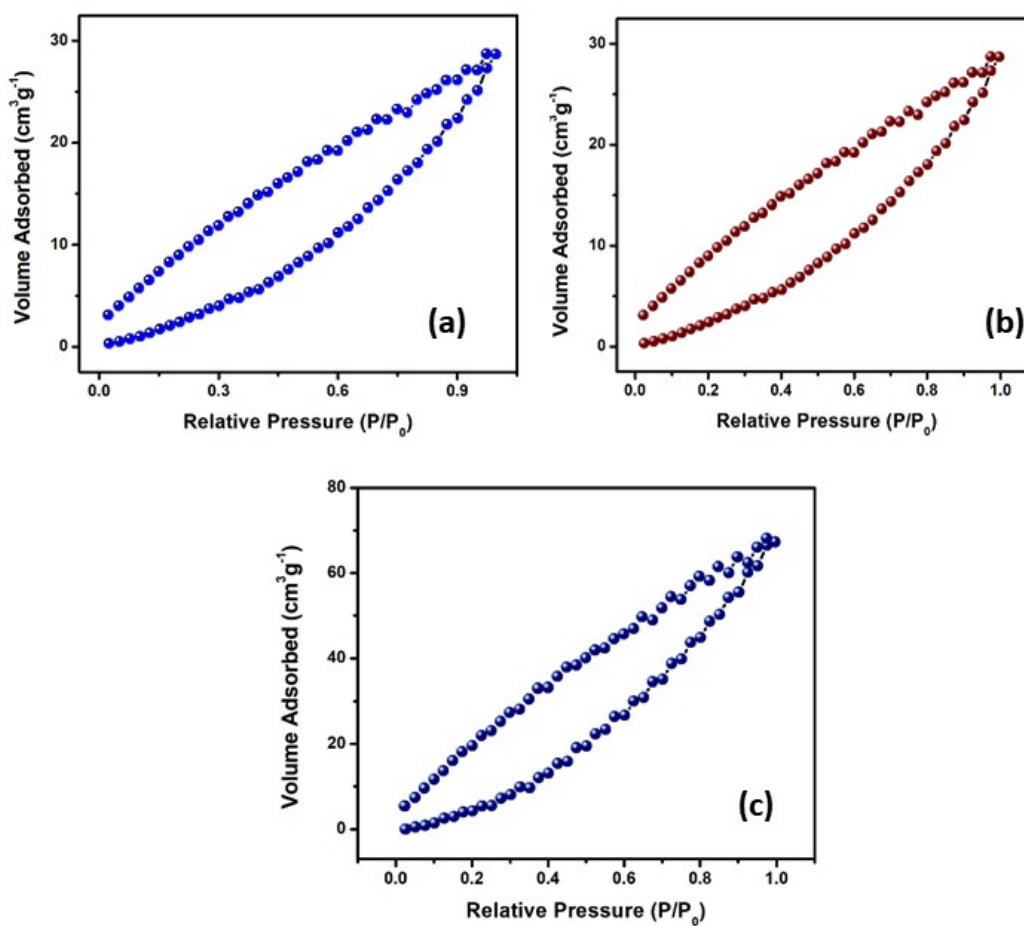

Fig.S11. Nitrogen adsorption–desorption isotherms of (a)  $\text{H}_2\text{L}$ , (b)  $\text{H}_2\text{L}+\text{HTFA}$  and (c)  $\text{H}_2\text{L}+\text{HTFA}+\text{TEA}$ .

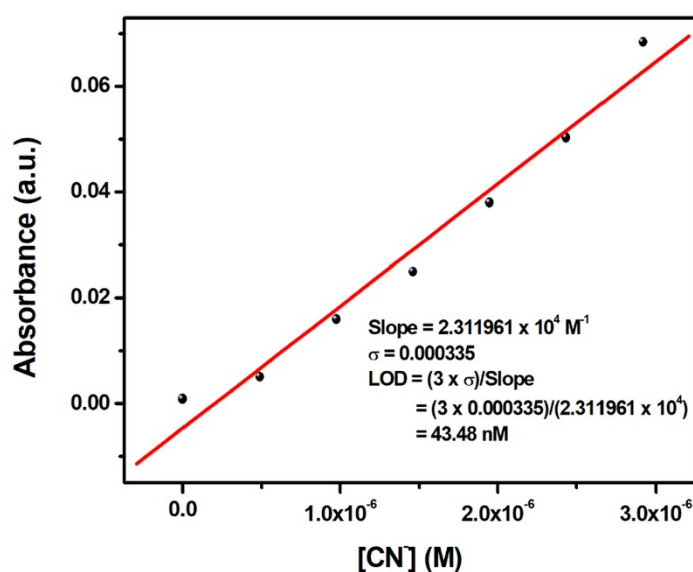

**Fig. S12.** Limit of Detection for  $\text{CN}^-$  sensing of the probe  $\text{H}_2\text{L}$ .

**Table S4:** Comparative Table for Reported Probes towards  $\text{CN}^-$  and TFA detection and their sensing features.

| Sl. No. | Reported Probes                                                                     | Selectivity/<br>Sensing<br>Solvent/<br>Stability       | Sensing<br>Mechanism                                       | Sensing Method<br>(Dual Channel)/<br>LOD<br>(Sensitivity) | Ratio-<br>metric<br>Response/<br>Dual<br>Response | Real<br>Applications in<br>environment-<br>al, food and<br>biological<br>samples/<br>Test Strip or<br>Thin film | Logic<br>gate<br>circuit/<br>Bioima-<br>ging in<br>plants<br>and<br>animals | Ref. |
|---------|-------------------------------------------------------------------------------------|--------------------------------------------------------|------------------------------------------------------------|-----------------------------------------------------------|---------------------------------------------------|-----------------------------------------------------------------------------------------------------------------|-----------------------------------------------------------------------------|------|
| 1.      | 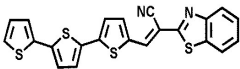 | $\text{CN}^-$ /<br>DMSO:H <sub>2</sub> O<br>(9:1, v/v) | Nucleophilic<br>addition to C=C<br>bond,<br>Intramolecular | Fluorometric<br>[Turn On]<br>Colorimetric                 | No/ No                                            | Yes (Food<br>Extract)/ Yes                                                                                      | No/ Yes                                                                     | [1]  |

|    |                                                                                     |                                                                         |                                                                                        |                                                                               |                                                                  |         |     |
|----|-------------------------------------------------------------------------------------|-------------------------------------------------------------------------|----------------------------------------------------------------------------------------|-------------------------------------------------------------------------------|------------------------------------------------------------------|---------|-----|
|    |                                                                                     | Charge Transfer<br>(ICT)                                                | (Yes)/ 0.46 $\mu$ M                                                                    |                                                                               |                                                                  |         |     |
| 2. | 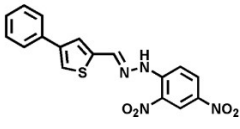   | CN <sup>-</sup> /<br>CH <sub>3</sub> CN:H <sub>2</sub> O<br>(7:3, v/v)  | ILCT (Intra ligand<br>Charge Transfer)<br>followed by<br>Deprotonation of<br>NH proton | Colorimetric<br><br>(No)/ 46.2 nM                                             | No/ No<br><br>Yes (Food<br>extract &<br>water sample)/<br><br>No | No/ No  | [2] |
| 3. |   | CN <sup>-</sup> /<br>DMSO/Yes                                           | Nucleophilic<br>addition to C=N<br>bond, ICT                                           | Fluorometric<br>[Turn On]<br><br>Colorimetric<br><br>(Yes)/ 21 nM             | No/ No<br><br>Yes (Food<br>Extract)/ No                          | No/ No  | [3] |
| 4. |  | CN <sup>-</sup> /<br>CH <sub>3</sub> CN:H <sub>2</sub> O<br>(95:5, v/v) | Deprotonation of<br><br>O-H proton                                                     | Colorimetric<br><br>(No)/ 0.22 $\mu$ M                                        | No/ No<br><br>No/ Yes                                            | No/ No  | [4] |
| 5. |  | CN <sup>-</sup> /<br>/DMF:H <sub>2</sub> O<br>(1:1, v/v)/ Yes           | Deprotonation of<br><br>O-H proton and<br>Nucleophilic<br>addition to C=N<br>bond      | Fluorometric<br><br>[Turn OFF]<br><br>Colorimetric<br><br>(Yes)/ 0.21 $\mu$ M | No/ No<br><br>No/ No                                             | No/ Yes | [5] |
| 6. |                                                                                     |                                                                         |                                                                                        |                                                                               |                                                                  |         |     |

|     |                                                                                     |                                                          |                                                |                                                             |         |                                         |         |      |
|-----|-------------------------------------------------------------------------------------|----------------------------------------------------------|------------------------------------------------|-------------------------------------------------------------|---------|-----------------------------------------|---------|------|
| 7.  | 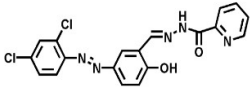   | CN <sup>-</sup> /<br>DMSO:H <sub>2</sub> O<br>(6:4, v/v) | Deprotonation of<br>O-H and N-H<br>proton      | Colorimetric<br>(No)/ 6.4 μM                                | No/ No  | No/ Yes                                 | No/ No  | [6]  |
| 8.  |    | CN <sup>-</sup> /<br>THF:H <sub>2</sub> O<br>(8:2)/ Yes  | CN <sup>-</sup> addition to<br>C=C double bond | Fluorometric<br>[Turn ON]<br>Colorimetric<br>(Yes)/ 2.23 μM | No/ No  | Yes (Food and<br>Water<br>Analysis)/ No | No/ Yes | [7]  |
| 9.  |    | CN <sup>-</sup> /<br>DMSO:H <sub>2</sub> O<br>(9:1, v/v) | Deprotonation of<br>O-H proton                 | Colorimetric<br>(No)/7.08 μM                                | No/ No  | No/ Yes                                 | No/ No  | [8]  |
| 10. |  | CN <sup>-</sup> / DMSO                                   | Nucleophilic<br>addition to C=C<br>bond, ICT   | Fluorometric<br>[Turn OFF]<br>Colorimetric<br>(Yes)/ 67 nM  | No/ No  | Yes (Food<br>Extract)/ Yes              | No/ Yes | [9]  |
| 11. |  | CN <sup>-</sup> / CH <sub>3</sub> CN/<br>Yes             | Deprotonation of<br>O-H and COOH,<br>ICT       | Colorimetric<br>(No)/3.68 μM                                | No/ No  | No/ No                                  | No/ No  | [10] |
| 11. |  | CN <sup>-</sup> /<br>DMSO/H <sub>2</sub> O<br>(6:4, v/v) | Nucleophilic<br>addition to C=C<br>bond, ICT   | Fluorometric<br>[Turn ON]<br>Colorimetric                   | Yes/ No | No/ No                                  | No/ No  | [11] |



(Yes)/ 0.18  $\mu$ M.

12.

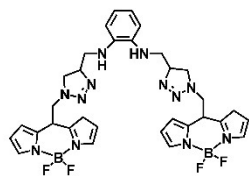CN<sup>-</sup>, F<sup>-</sup>/ THF

Deprotonation of

Colorimetric

No/ Yes

No/ No

No/ No

[12]

C-H proton

(No)/

72 (CN<sup>-</sup>) and 83  
nM (F<sup>-</sup>)

13.

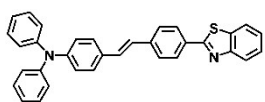

HTFA

Protonation of N

Fluorometric

HNO<sub>3</sub>, HCl/  
CHCl<sub>3</sub>donor of  
benzothiazole  
moiety, ICT

[Turn OFF]

No/ No

No/ Yes

No/ No

[13]

Solid-state

(Yes)/ 2.8 ppm

(Solvent free)

(TFA)

14.

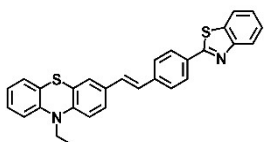

HTFA,

Proronation of N

Fluorometric

HNO<sub>3</sub>donor  
benzothiazole  
moiety, ICT

[Turn OFF]

No/ No

No/ Yes

No/ No

[14]

HCl/

CH<sub>2</sub>Cl<sub>3</sub>/Yes

(Yes)/ 2.3 ppm

(TFA)

15.

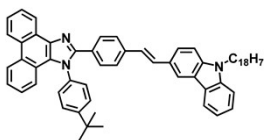HTFA/ CH<sub>2</sub>Cl

Solid-state

Protonation of  
Imidazole moiety,  
ICT

Fluorometric

Yes/ No

No/ Yes

No/ No

[15]

(Solvent free)

[Turn ON]

(No)/ 7.4 ppm

16.

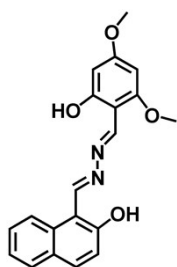

|                                     |                        |                            |         |                         |                      |
|-------------------------------------|------------------------|----------------------------|---------|-------------------------|----------------------|
| HTFA, CN <sup>-</sup> /             | Protonation of         | Fluorometric               |         | Yes                     | Yes                  |
| Solid-State                         | the imine N of         | [Turn OFF-                 | No/ Yes | (Food                   | (CN <sup>-</sup> )/  |
| (HTFA                               | the azine              | TFA]                       |         | Extract)                | This                 |
| Vapour)/Yes                         | derivative (TFA)       |                            |         |                         | work                 |
| CH <sub>3</sub> CN/H <sub>2</sub> O | Deprotonation of       | [Turn ON-CN <sup>-</sup> ] |         | (CN <sup>-</sup> )/ Yes | Yes (CN <sup>-</sup> |
| (99:1, v/v)                         | O-H (CN <sup>-</sup> ) | Colorimetric               |         | (CN <sup>-</sup> /HTFA) | /AIE)                |
| (CN <sup>-</sup> )/Yes              |                        | [TFA, CN <sup>-</sup> ]    |         |                         |                      |
|                                     |                        | (Yes)/ 1.41 ppm            |         |                         |                      |
|                                     |                        | (TFA)                      |         |                         |                      |
|                                     |                        | 45.42 nM                   |         |                         |                      |
|                                     |                        | (CN <sup>-</sup> )         |         |                         |                      |

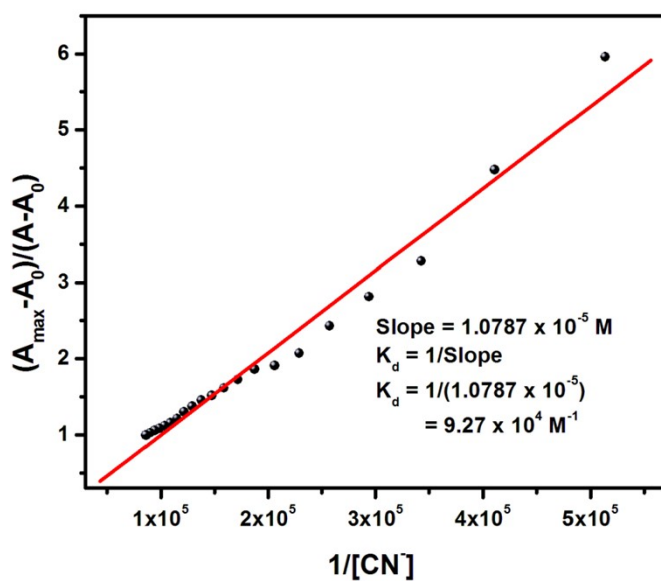

**Fig. S13.** Determination of Binding Constant ( $K_d$ ) from from Benesi-Hildreband Plot of  $\text{CN}^-$  Titration Curve.

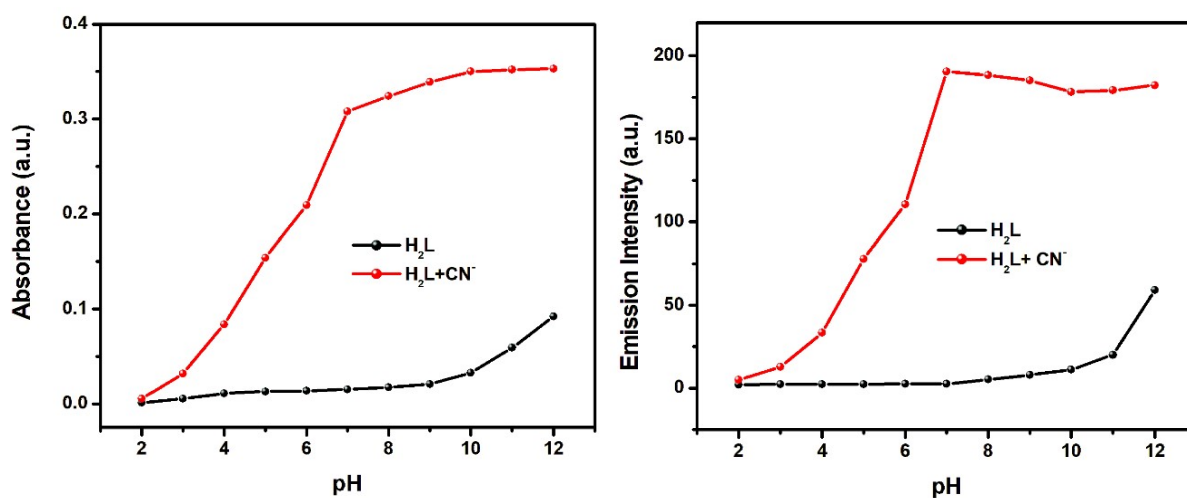

**Fig.S14.** Changes in (a) Absorption ( $\lambda_{\text{abs}} = 479 \text{ nm}$ ) and (b) Emission Spectra ( $\lambda_{\text{exc}} = 570 \text{ nm}$ ) of  $\text{H}_2\text{L}$  and  $\text{H}_2\text{L}+\text{CN}^-$  under different pH.

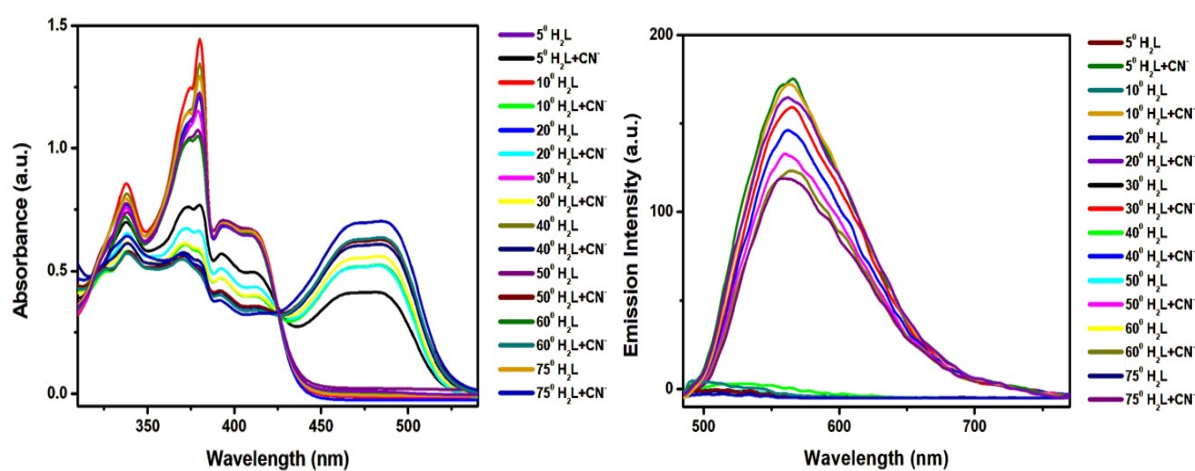

**Fig.S15.** Changes in (a) Absorption ( $\lambda_{\text{abs}} = 479 \text{ nm}$ ) and (b) Emission Spectra ( $\lambda_{\text{exc}} = 570 \text{ nm}$ ) of  $\text{H}_2\text{L}$  and  $\text{H}_2\text{L}+\text{CN}^-$  under temperature variation from  $5^\circ\text{C}$  to  $75^\circ\text{C}$ .

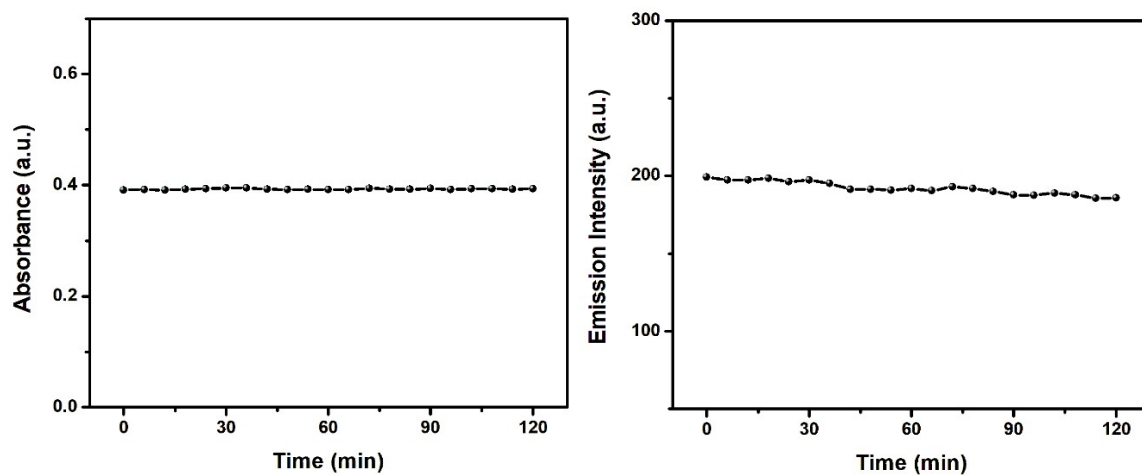

**Fig.S16.** Changes in (a) Absorption ( $\lambda_{\text{abs}} = 479 \text{ nm}$ ) and (b) Emission Spectra ( $\lambda_{\text{exc}} = 570 \text{ nm}$ ) of  $\text{H}_2\text{L}$  and  $\text{H}_2\text{L}+\text{CN}^-$  on time variation for about 2 hrs.

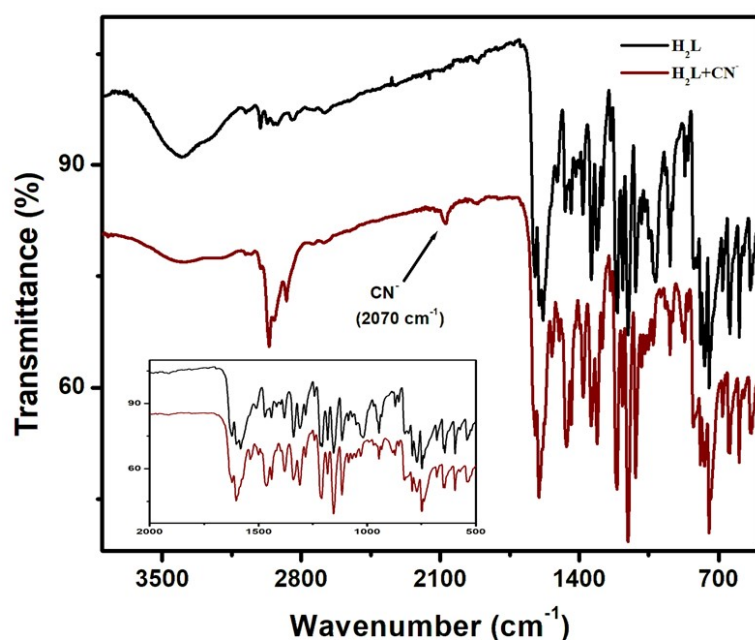

**Fig.17.** IR spectrum of  $\text{H}_2\text{L}$  and  $(\text{H}_2\text{L}+\text{CN}^-)$  adduct (Inset: Expanded Region from  $2000 \text{ cm}^{-1}$  to  $500 \text{ cm}^{-1}$ ).

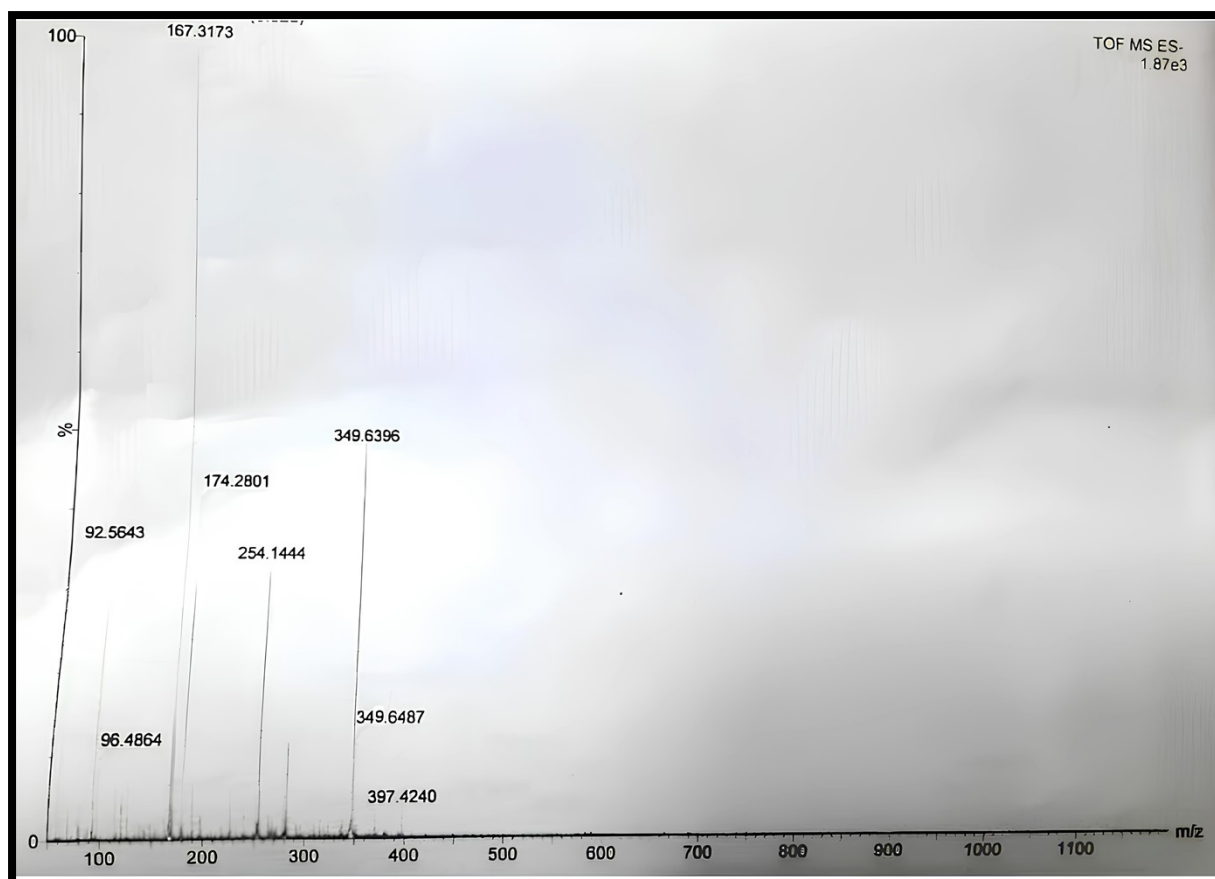

**Fig. S18.** ESI-MS (-ve) mode of  $\text{CN}^-$  Complex ( $\text{H}_2\text{L}+2\text{CN}^-$ )

**Table S5:** TD-DFT transition of  $\text{H}_2\text{L}$  and  $\text{CN}^-$  complex ( $\text{L}^{2-}$ ) .

| System               | Vertical Excitation Energy (eV) | Exp. Wavelength (nm) | Theor. Wavelength (nm) | Oscillation Frequency | Key Transition              |
|----------------------|---------------------------------|----------------------|------------------------|-----------------------|-----------------------------|
| $\text{H}_2\text{L}$ | 3.1252                          | 410                  | 409.04                 | 1.0918                | HOMO $\rightarrow$ LUMO     |
|                      | 3.7225                          | 337                  | 334.15                 | 0.1548                | HOMO-2 $\rightarrow$ LUMO   |
| $\text{L}^{2-}$      | 2.7410                          | 474                  | 452.33                 | 0.8995                | HOMO $\rightarrow$ LUMO     |
|                      | 3.9154                          | 338                  | 316.66                 | 0.0283                | HOMO-1 $\rightarrow$ LUMO+1 |

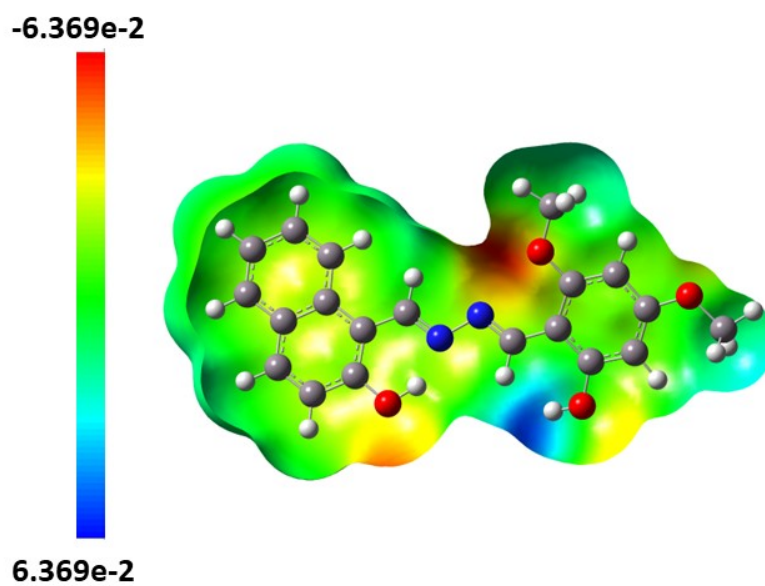

**Fig.S19.** Electrostatic Potential (ESP) Mapping of the optimized probe H<sub>2</sub>L calculated from B3LYP/6-311g level with scale bar (Kcal/mol).

**Table S6:** Orbitals of H<sub>2</sub>L and their corresponding energies.

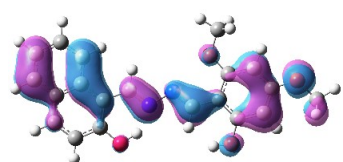

HOMO-5  
(-7.36 eV)

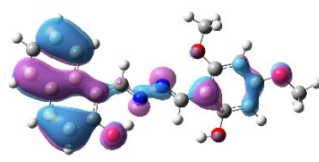

HOMO-4  
(-6.36 eV)

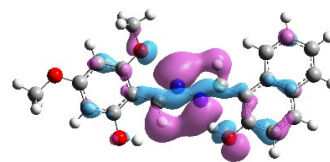

HOMO-3  
(-6.33 eV)

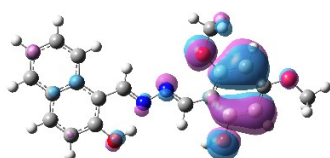

HOMO-2  
(-6.19 eV)

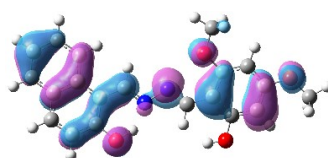

HOMO-1  
(-6.15 eV)

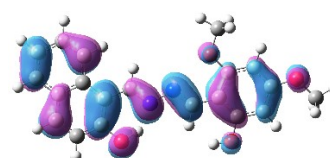

HOMO  
(-5.37 eV)

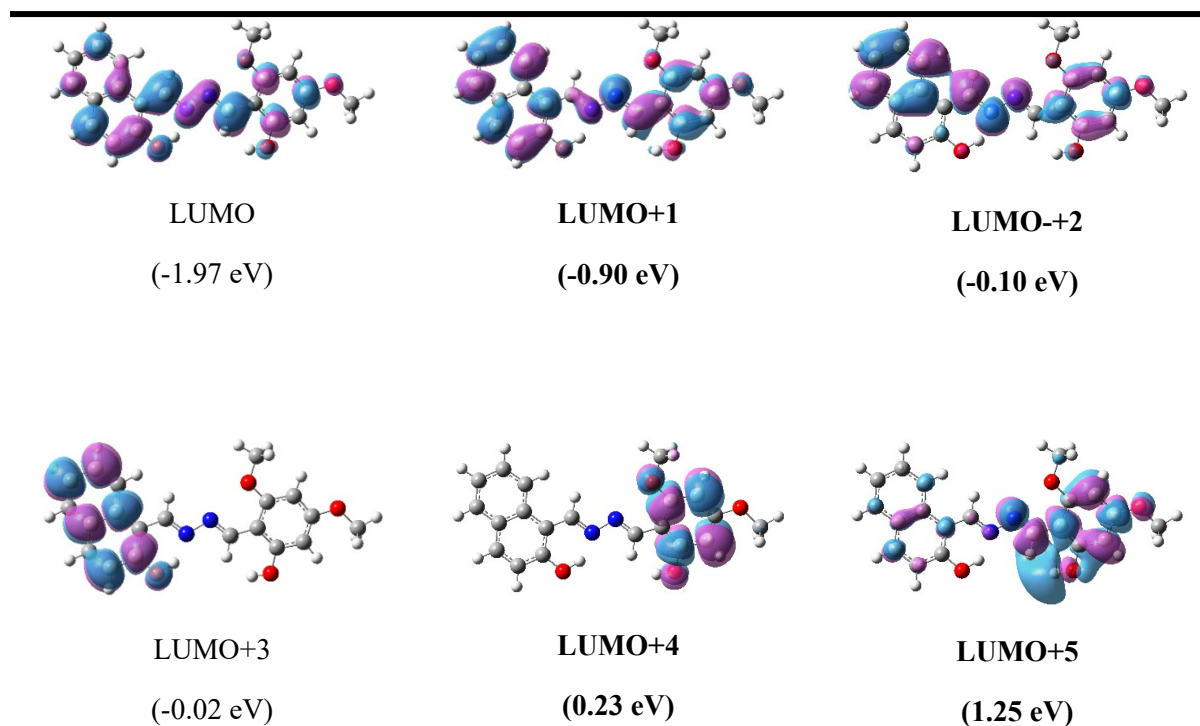

**Table S7:** Molecular Orbitals of  $L^{2-}$  and their corresponding energies.

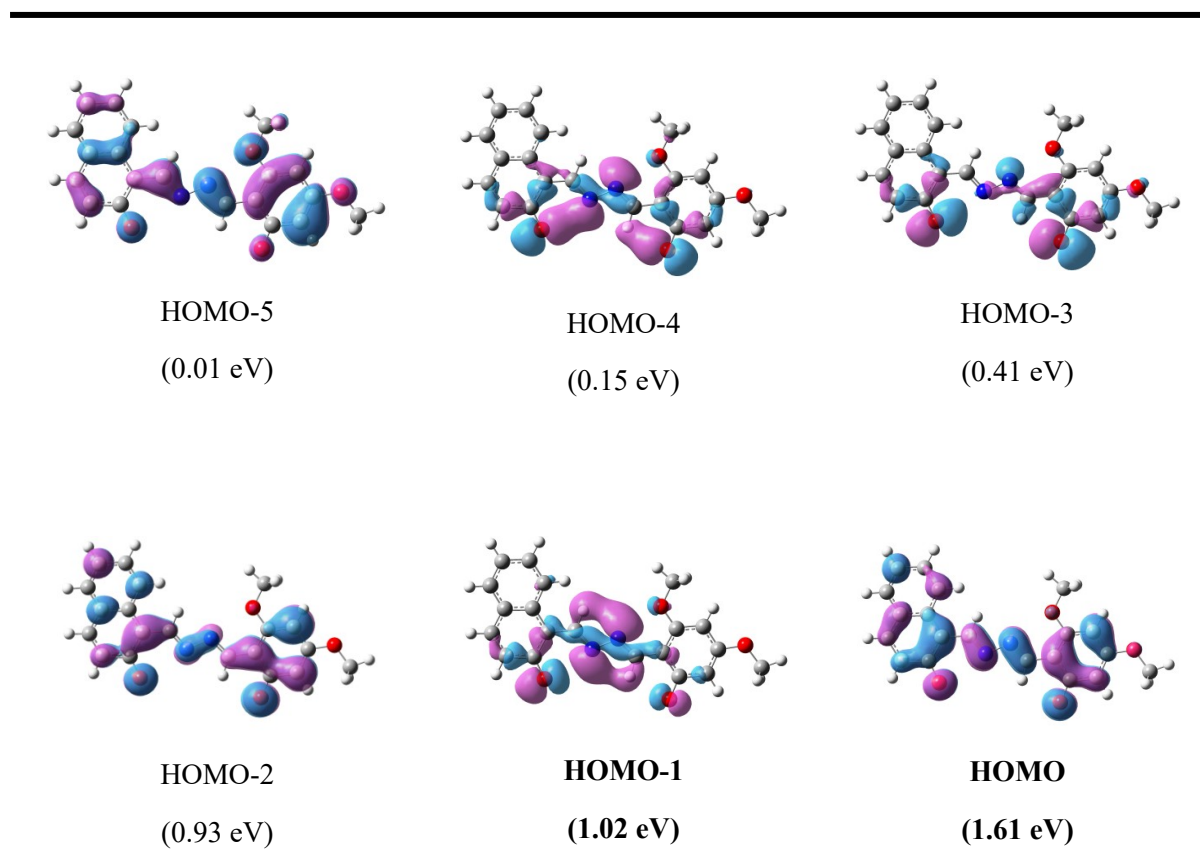

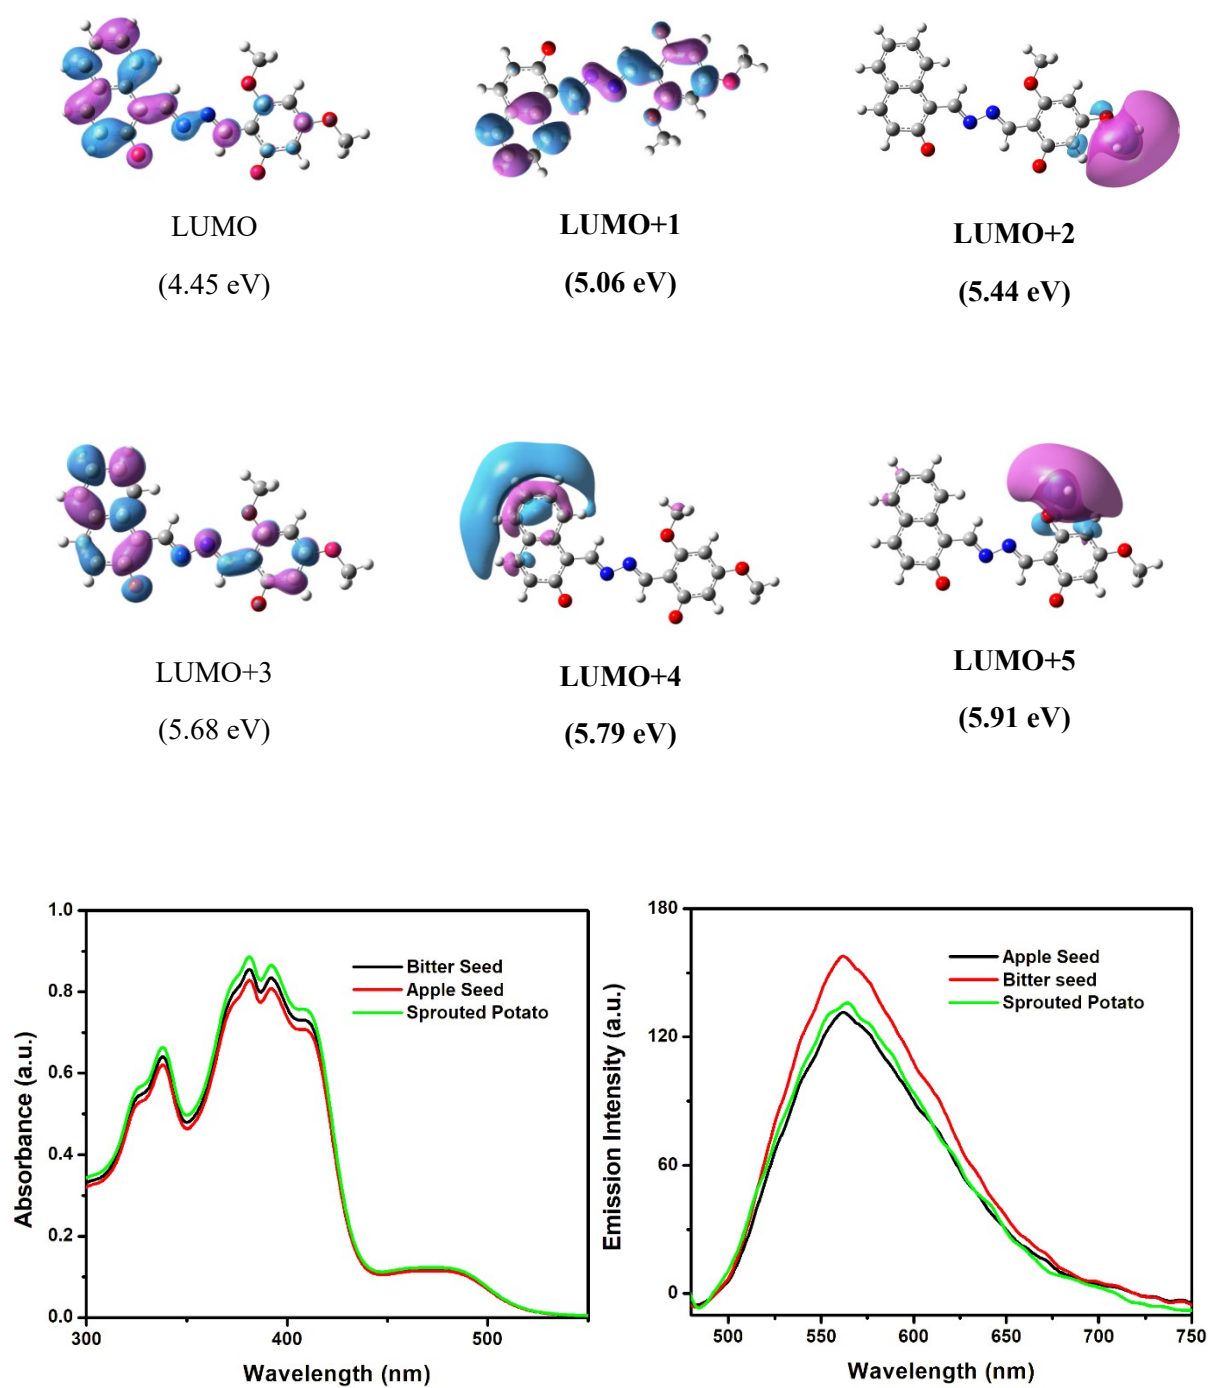

**Fig.S20.** (a) Absorption and (b) Fluorescence Spectra of H<sub>2</sub>L towards CN<sup>-</sup> in different food samples.



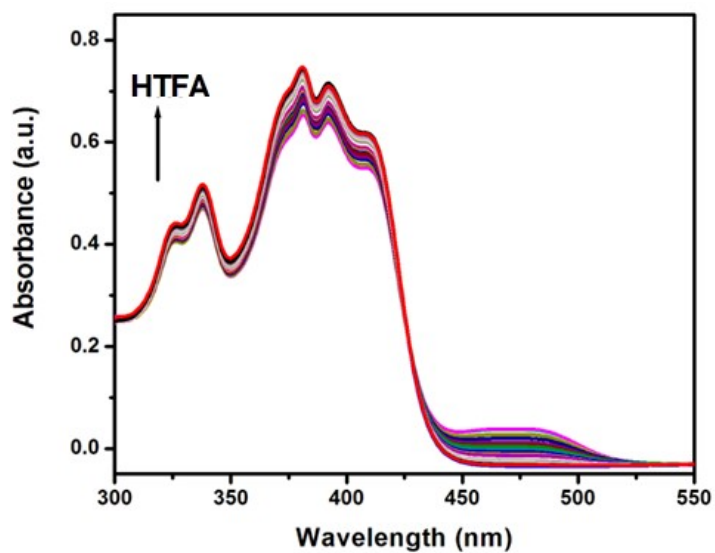

**Fig.S21.** Change in Absorption Spectra of  $\text{CN}^-$  Complex on gradual addition of HTFA ( $\text{H}^+$ ).

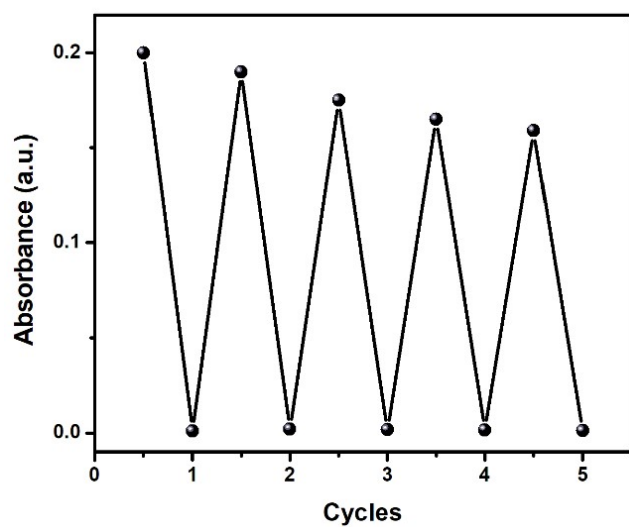

**Fig.22.** Reversible Cycles on addition of  $\text{CN}^-/\text{HTFA}$ .

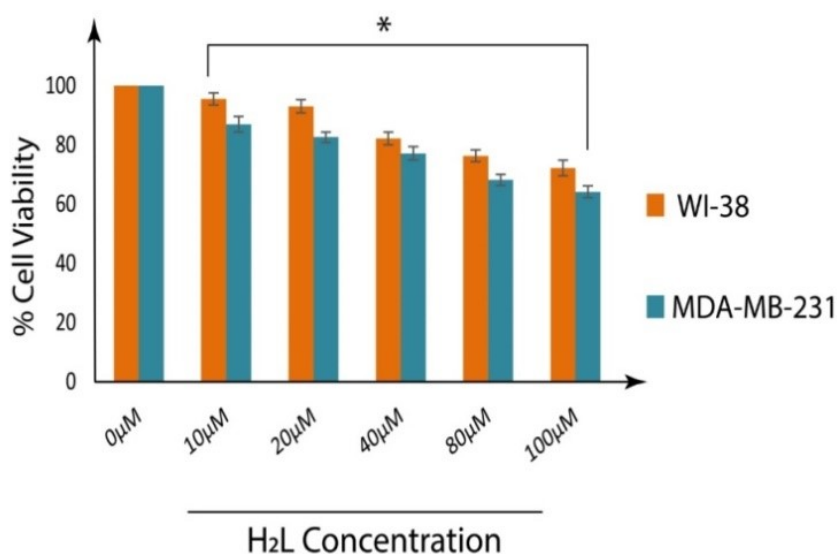

**Fig. S23.** Cell survivability of MDA-MB 231 and WI-38 cells exposed to ligand H<sub>2</sub>L concentration. Data are representative of at least three independent experiments and bar graph shows mean  $\pm$  SEM, \* $p < 0.001$  were interpreted as statistically significant, as compared with the control

#### Reference:

1. Q. Niu, L. Lan, T. Li, Z. Guo, T. Jiang, Z. Zhao, Z. Feng, J. Xi, *Sens. Actuators B Chem.*, 2018, **276**, 13-22
2. P. Karuppusamy, S. Sarveswari, *J. Mol. Struct.*, 2022, **1248**, 131494.
3. R. Shanmugapriya, P. Saravana Kumar, S. Ponkarpagam, C. Nandhini, K.N. Vennila , A. G. Al-Sehemi, M. Pannipara, K. P. Elango, *J. Mol. Struct.*, 2022, **1251**, 132081.
4. T. P. Martyanov, A. A. Kudrevatykh, E. N. Ushakov, D.V. Korchagin, I. V. Sulimenkov, S. G. Vasil'ev, S. P. Gromov , L. S. Klimenko, *Tetrahedron*, 2021, **93**, 132312.

5. B. Yilmaz, M. Keskinates, Z. Aydin, M. Bayrakci, *J. Photochem. & Photobio. A: Chem.*, 2022, **424**, 113651
6. Z. Li, C. Liu, S. Wang, L. Xiao, X. Jing, *Spectrochim. Acta A*, 2019, **210**, 321–328.
7. Y. Gao, M. Li, X. Tian, K. Xu, S. Gong, Y. Zhang, Y. Yang, Z. Wang, S. Wang, *Spectrochim. Acta A*, 2022, **271**, 120882.
8. S. Dey, C. Sen, C. Sinha, *Spectrochim. Acta Part A*, 2020, **225**, 117471.
9. G.A. Zalmi, D.N. Nadimetla, P. Kotharkar, A. L. Puyad, M. Kowshik, and S. V. Bhosale, *ACS Omega* 2021, **6**, 16704–16713.
10. R. V. Rathod, S. Bera, D. Mondal, *Spectrochim. Acta A*, 2020, **238**, 118419.
11. J.-J. Li, W. Wei, X.-L. Qi, X. Xu, Y.-C. Liu, Q.-H. Lin, W. Dong, *Spectrochim. Acta Part A*, 2016, **152**, 288-293.
12. W. Saiyasombat, U. Eiamprasert, T. Chantarojsiri, K. Chainok, S. Kiatisevi, *Dyes Pigments*, 2022, **206**, 110643.
13. Y. Zhan, P. Yang, G. Li, Y. Zhang and Y. Bao, *New J. Chem.*, 2017, **41**, 263-270.
14. Y. Zhan, J. Zhao, P. Yanga and W. Ye, *RSC Adv.*, 2016, **6**, 92144-92151
15. J. Peng, J. Sun, P. Gong, P. Xue, Z. Zhang, G. Zhang, R. Lu, *Chem. Asian J.*, 2015, **10**, 1717-1734.
